# Supplementary material
Source: PubMed Central journal article supplement (PMC2953176)
Supplement: supp_84_21_11200__1.pdf [file supp_84_21_11200__1.pdf]

```

HXB2_K03455.1/1-856 1 MRVK--EKYQHLWRWGWRWGTMLLGMLMICSATEKWLWVTVYYGVPVWKEATTT51
108051_005/1-869 1 MRVKGIRRNQHL---WRCVTL LLLGILMICSVAGNLWVTVYYGVPVWKEATTT50
108051-006/1-876 1 MRVKGIRRNQHL---WRCVTL LLLGILMICSVAGNLWVTVYYGVPVWKEATTT50

HXB2_K03455.1/1-856 52 LFCASDAKAYDTEVHNVWATHACVPTDPNPQEVVLVNVTENFNMWKNNDMVEQMH105
108051_005/1-869 51 LFCASDAKAYDTEVHNVWATHACVPTDPNPQELALENVTENFNMWENDMVEQMH104
108051-006/1-876 51 LFCASDAKAYDTEVHNVWATHACVPTDPNPQELALENVTENFNMWENDMVEQMH104

HXB2_K03455.1/1-856 106 EDIISLWDQSLKPCVKLTPLCVSLKCTDLKNDTNTNSSGRM-IMEKGEIKNCS158
108051_005/1-869 105 EDIISLWDQSLKPCVKLTPLCVTLNCTDAEVTGKTNTTIGEWKVKEGEMKNCS158
108051-006/1-876 105 EDIISLWDQSLKPCVKLTPLCVTLNCTDAEVTGKTNTTSGDWEKVKKGEIKNCS158

HXB2_K03455.1/1-856 159 FNISTSIIRGKVKQKEYAFFYKLDIIPIDNDTTS-----YKLTSCNT198
108051_005/1-869 159 FD-AINTKKNVQKQYALFDTLDVVPIDDDNNS-----NSNSYSDFRLLTKCDT203
108051-006/1-876 159 FD-AINTKKNVQKQYALFDTLNVVSI DDDNNSNNNSNNNNNTNYSDFRLLTKCDT211

HXB2_K03455.1/1-856 199 SVITQACP KVSFEP IPIHYCAPAGFAILKCNKTFNGTGPCCTNVSTVQCTHGIR252
108051_005/1-869 204 SVIRQACP KVSFEP IPIHYCAPAGFAILKCNETDFNGTGLCNNVSTVQCTHGIR257
108051-006/1-876 212 SVIRQACP KVSFEP IPIHYCAPAGFAILKCNETDFNGTGLCNNVSTVQCTHGIR265

HXB2_K03455.1/1-856 253 PVVSTQLLLLNGSLAE EEVVIRSVNFTDNAKTIIVQLNTSVEINCTRPNNNTRKR306
108051_005/1-869 258 PVVSTQLLLLNGSLAE EGVVLR SKDFKENTKIIIVQLNKAVNICTRPNNNTRKRG311
108051-006/1-876 266 PVVSTQLLLLNGSLAEKGVVLR SKDFKENTKIIIVQLNKAVNICTRPNNNTRKRG319

HXB2_K03455.1/1-856 307 IRIQRGPGRAFVTIGKIGNMRQAHCNISRAKWNNTLKQIASKLR EQFGNNKTI I360
108051_005/1-869 312 VHM--GPGGALFATDVI GDIRKAHCNITRE EWNNTLKQIVLKLKEKFENKTKIV363
108051-006/1-876 320 VHM--GPGGALFATDVI GDIRKAHCNITRE EWNNTLKQIVLKLKEKFENKTKIV371

HXB2_K03455.1/1-856 361 FKQSSGGDPEIVTHTSFNCGGEFFCYNSTQLFNSTWFNSTWSTEGSNTEGSDTI414
108051_005/1-869 364 FTNSGGDPEVTMHTFNCGGEFFCYNTTELFSSSTW-NITGDSIGNITGEYTLNI416
108051-006/1-876 372 FTNSGGDPEVTMHTFNCGGEFFCYNTTELFSSSTW-NITGDSIGNITGE-SLNI423

HXB2_K03455.1/1-856 415 TLPCKRIKQIINMWQGVGKAMYAPPISGQIRCSNITGLLLLTRDGGNSN----NE464
108051_005/1-869 417 TLPCKRIKQIINMWQGVGKAMYAPPISGQIRCSNITGLLLLTRDGGNNTENDNN470
108051-006/1-876 424 TLPCKRIKQIINMWQGVGKAMYAPPISGQIRCSNITGLLLLTRDGGDNTENDNN477

HXB2_K03455.1/1-856 465 SEIFRPGGDMRDNRSELYKYKVVKLEPLGVAPTAKARRVVQREKRAVIGAL518
108051_005/1-869 471 TEIFRPGGDMRDNRSELYKYKVVKLEPLGLAPTAKARRVVQREKRAIGVGAM524
108051-006/1-876 478 TEIFRPGGDMRDNRSELYKYKVVKLEPLGLAPTAKARRVVQREKRAIGVGAM531

HXB2_K03455.1/1-856 519 FLGFLGAAGSTMGAASMTLTVQARQLLSGIVQQQNNLLRAIEAQQHLQLQTVWG572
108051_005/1-869 525 FLGFLGAAGSTMGAASLTLTVQARQLLSGIVQQQNNLLRAIEAQQHLQLQTVWG578
108051-006/1-876 532 FLGFLGAAGSTMGAASLTLTVQARQLLSGIVQQQNNLLRAIEAQQHLQLQTVWG585

HXB2_K03455.1/1-856 573 IKQLQARILAVERYLKDQQLLGIWGC SGKLICTTAVPWNASW-----SNKSL619
108051_005/1-869 579 IKQLQARVLAVERYLKDQQLLGIWGC SGKLICTTTVPWNDSWGY SWSNRNTKSL632
108051-006/1-876 586 IKQLQARVLAVERYLKDQQLLGIWGC SGKLICTTTVPWNDSWGY SWSNRNTKSL639

HXB2_K03455.1/1-856 620 EQIWNHTTWMEWDR EINNYSLSLHSLIEEQNQEKNEQELLELDKWLWLNWF673
108051_005/1-869 633 EEIWDNLTWREWEREIDNYTDLIYNLIEKSNQEKNEQELLELDKWANLWLNWF686
108051-006/1-876 640 EEIWDNLTWREWEREIDNYTDLIYNLIEKSNQEKNEQELLELDKWANLWLNWF693

HXB2_K03455.1/1-856 674 NITNWLWYIKLFI MIVGGLVGLRIVFAVLSIVNRVROQYSPLSFQTHLPTPRGP727
108051_005/1-869 687 DITNWLWYIRIFIMIVGGLVGLRIVFAVLSIVRRVROQYSPLSFQTHLPTPRGP740
108051-006/1-876 694 DITNWLWYIRIFIMIVGGLVGLRIVFAVLSIVRRVROQYSPLSFQTHLPTPRGP747

HXB2_K03455.1/1-856 728 DRPEGIEEEEGGERDRDRSIRLVNGSLALIWDDLRSCLCLFSYHRLRDL LLIIVTR1781
108051_005/1-869 741 DRPEGTEKEGGEQDRGRSVRLVDGFLALFWDDLRSCLCLFLYHRLRDL LLIIVTR1794
108051-006/1-876 748 DRPEGIEEEEGGEQDRGRSVRLVDGFLALFWDDLRSCLCLFLYHRLRDL LLIIVTR1801

HXB2_K03455.1/1-856 782 VELLGRRGWEALKYWWNLLQYWSQELKNSAVSLLNATAI VAEGTDRVIEVVGQ835
108051_005/1-869 795 VGVLGHRGWEILKYWWSLIQYWSQELKNSAVSLLNATAI VAEGTDRVIEIVR848
108051-006/1-876 802 VGVLGHRGWEILKYWWSLIQYWSQELKNSAVSLLNATAI VAEGTDRVIEIRQR855

HXB2_K03455.1/1-856 836 ACRAIRHIPPRI RQGLERILL 856
108051_005/1-869 849 VFRGVLHIPPRI RQGLERALL 869
108051-006/1-876 856 VFRGVLHIPPRI RQGLERALL 876

```

**Figure S1.** MAFFT alignment of HBX2 reference sequence and 108051 clones 005 and 006 (accession numbers K03455.1, HM769943 and HM769944 respectively).

**Table S1.** Effect of antibody and peptide inhibitors of  $\alpha 4\beta 7$  binding on the neutralization of viruses with envelopes from subject 108051

| Viruses/ Clones <sup>a</sup> | IC50 ( $\mu\text{g}/\text{mL}$ antibody, $\mu\text{M}$ peptide) of indicated MAb or fusion inhibitor <sup>b</sup> |           |        |                |                                    |                                         |
|------------------------------|-------------------------------------------------------------------------------------------------------------------|-----------|--------|----------------|------------------------------------|-----------------------------------------|
|                              | Z23                                                                                                               | Act-1 MAb | CWLDVC | Act-1 + CWLDVC | $\alpha 4/\text{CD}49\text{d}$ MAb | $\alpha 4/\text{CD}49\text{d}$ + CWLDVC |
| 108051_005 wtR               | <100                                                                                                              | >20       | 14     | >20            | >20                                | >20                                     |
| 108051_006 wtS               | <b>2298</b>                                                                                                       | >20       | 12     | >20            | >20                                | >20                                     |
| 108051_005_D179N             | <b>3758</b>                                                                                                       | >20       | 12     | >20            | >20                                | >20                                     |
| JRC5F                        | <b>422</b>                                                                                                        | >20       | 19     | >20            | >20                                | >20                                     |
| NL43                         | <b>3042</b>                                                                                                       | >20       | 13     | >20            | >20                                | >20                                     |
| aMLV                         | <100                                                                                                              | >20       | 12     | >20            | >20                                | >20                                     |

<sup>a</sup> wtR, indicates wild type resistant; wtS, indicates wild type sensitive. MAbs Act-1 and CD49d are known to react with the  $\alpha 4\beta 7$  and  $\alpha 4$  chain of VLA4, respectively. CWLDVC is a synthetic peptide known to inhibit  $\alpha 4\beta 7$  binding. The CWLDVC peptide used at a  $10\mu\text{M}$  concentration was known to inhibit gp120 binding to  $\alpha 4\beta 7$  in control experiments using the RPMI8866,  $\alpha 4\beta 7$ -expressing cell line (65).

<sup>b</sup> Values in bold represent neutralization titers that are at least 3 times greater than those observed against the negative control (aMLV).

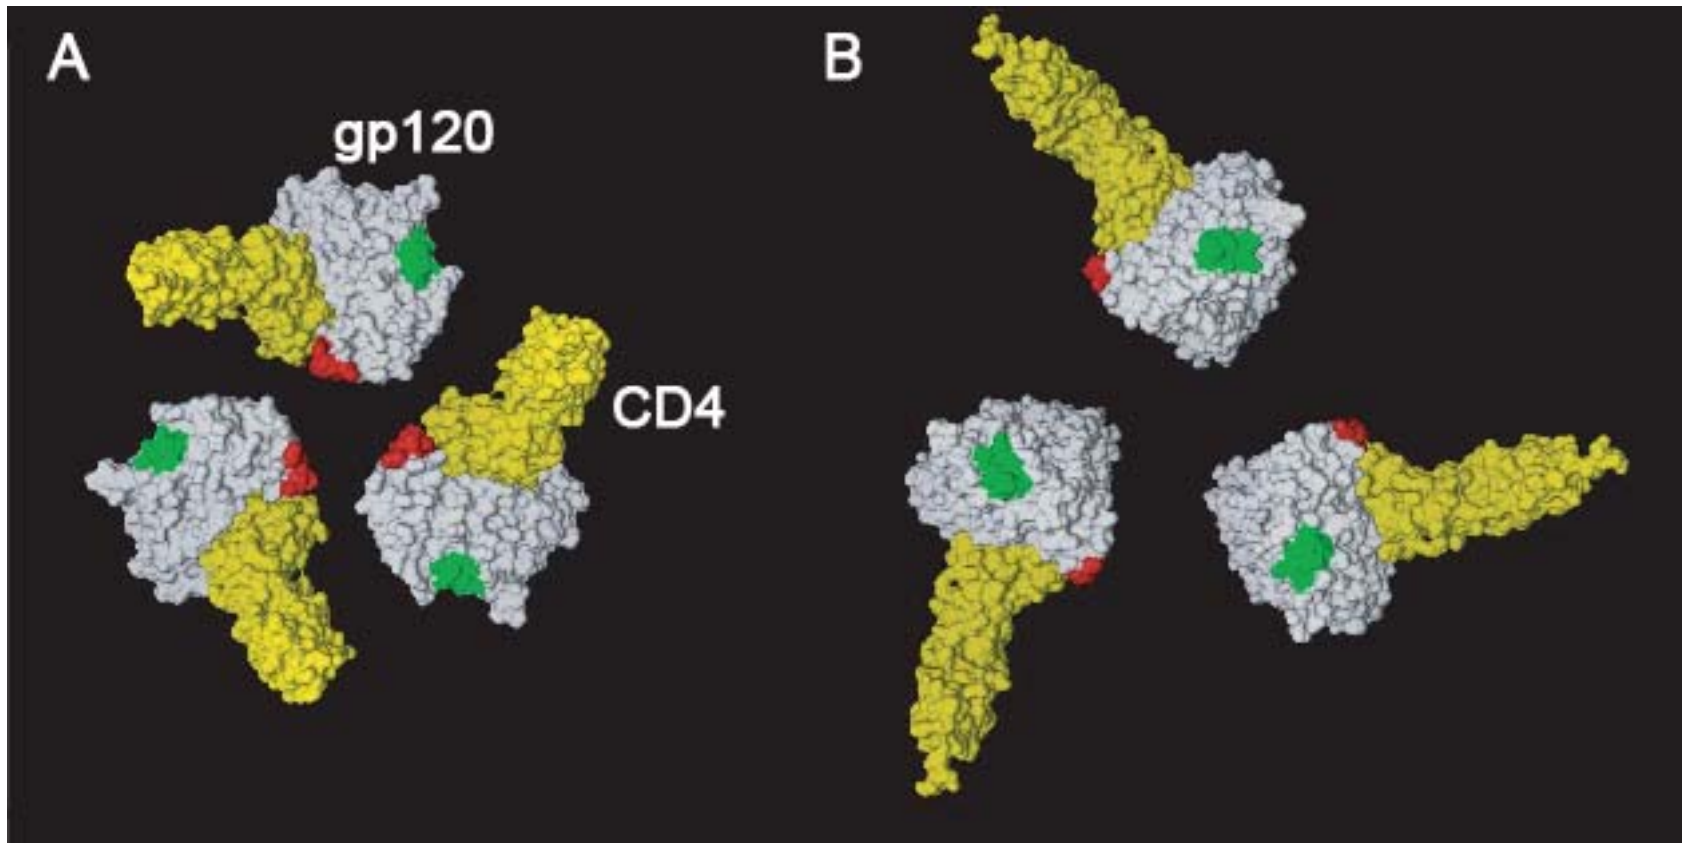

**Figure S2.** Conformational changes that affect the V2 domain in HIV envelope trimer before and after CD4 binding. Figure represents the orientation of gp120 monomers before (A) and after (B) a conformational change triggered by the binding of CD4. Gray, indicates gp120 monomers; yellow, indicates CD4; red, indicates the V2 domain stem; green, indicates the V3 domain stem. Following CD4 engagement, the monomers rotate and change position with respect to the central axis of symmetry. The distance between the V2 stems increases, and the V3 stems become positioned at the top. Data taken from Liu et al. (41).
